# Supplementary material for: Neuroimaging-based analysis of DBS outcome in pediatric dystonia: Insights from the GEPESTIM registry
Source: medRxiv preprint, doi:10.1101/2023.02.14.23285901, version 1 (2023-02-22)
Supplement: suppl. Fig. 1 [file 285901_file03.docx]

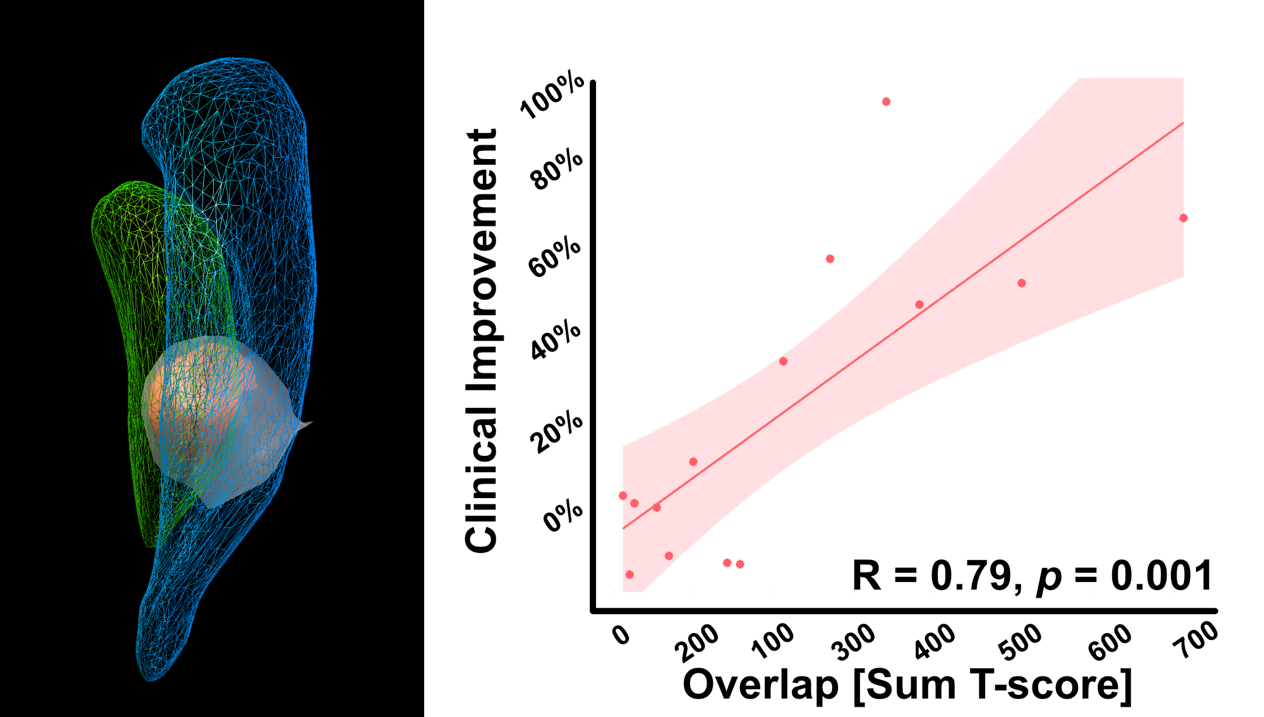


**Supplementary Figure 1**

Sweetspot overlap correlation for inherited and idiopathic cases. Left panel shows unthresholded sweetspot T-model in grey and thresholded (t > 2) in red together with a wireframe GPi (green) and GPe (blue) in pediatric MNI space.


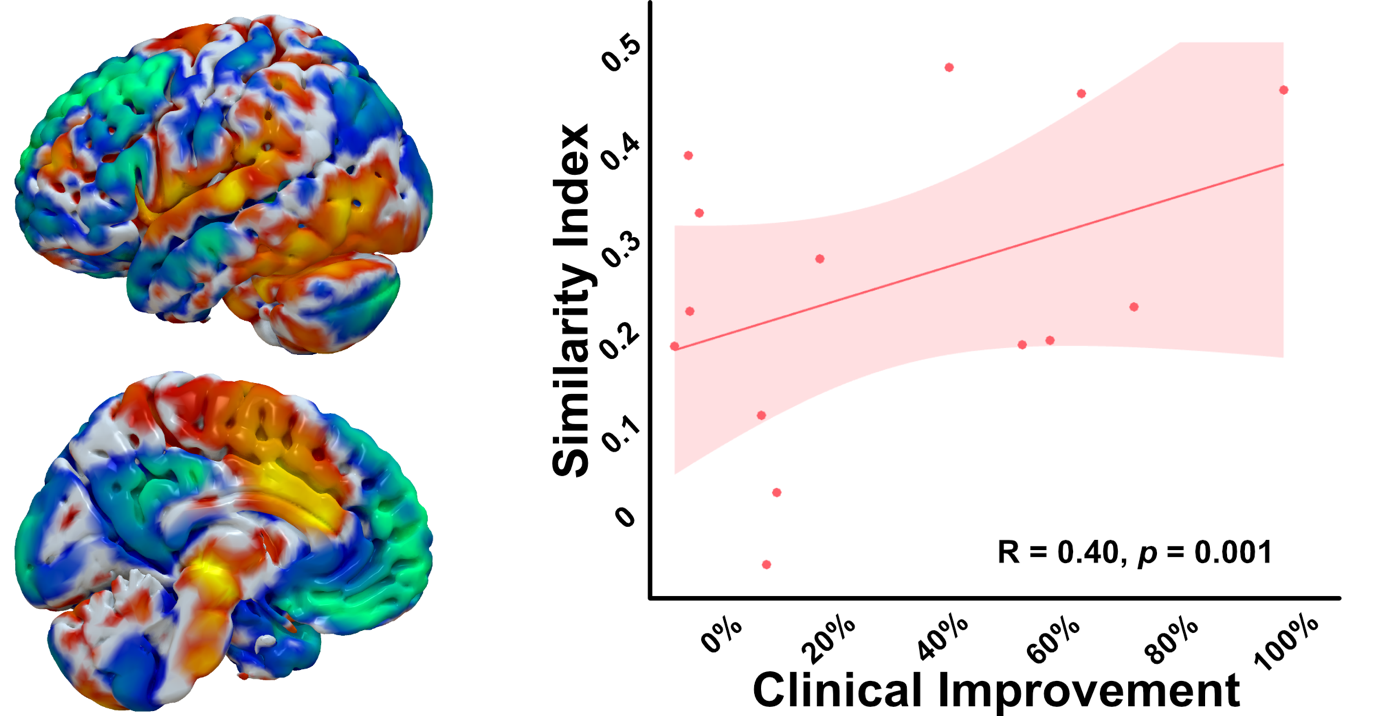


**Supplementary Figure 2**

Network correlation for inherited and idiopathic dystonia cases. Left panel shows the functional network correlate overlaid on a pediatric template surface model.
